# Supplementary material for: A green and energy-efficient photocatalytic process for the accelerated synthesis of lactic acid esters using functionalized quantum dots
Source: Royal Society of Chemistry journal article supplement (doi:10.1039/d1re00017a), 2021-01-01
Supplement: d1re00017a1.pdf [file d1re00017a1.pdf]

**A Green and Energy efficient Photocatalytic Process for accelerated synthesis of Lactic Acid Esters using functionalized quantum dots**

**Priyanka Verma<sup>a</sup>, Ravinder Kumar Wanchoo<sup>a</sup> and Amrit Pal Toor<sup>a,b\*</sup>**

<sup>a</sup>Dr. SSB University Institute of Chemical Engineering and Technology, Panjab University,  
Chandigarh, 160014, India

<sup>b</sup>Energy Research Centre,, Panjab University, Chandigarh, 160014, India

**Supplementary Information**

S1. TEM Micrographs (a) QD-TiO<sub>2</sub> (b) QD-TiO<sub>2</sub>@S and (c)Re-QD-TiO<sub>2</sub>@S

S2. (a) XRD pattern QD-TiO<sub>2</sub>@S calcined at 300 °C at various calcinations temperatures . (b) XRD pattern QD-TiO<sub>2</sub>@S calcined at 573K at various calcinations times from 1 hr to 4hrs.

S3. EDS data of (a)QD-TiO<sub>2</sub>@S , (b)P25-TiO<sub>2</sub>@S and (c)COM-TiO<sub>2</sub>@S and (a1)Re-QD-TiO<sub>2</sub>@S , (b1)Re-P25-TiO<sub>2</sub>@S and (c1)Re-COM-TiO<sub>2</sub> .

S4. Elemental dispersion mapping of QD-TiO<sub>2</sub>@S (a) Combined elemental mapping (b) O mapping (c) S mapping (d) Ti mapping.

S5. XPS survey scan of QD-TiO<sub>2</sub>, QD-TiO<sub>2</sub>@S and Re-QD-TiO<sub>2</sub> compared with P25-TiO<sub>2</sub>@S and COM-TiO<sub>2</sub>@S.

S6. Reusability test of catalyst at 303.15K , catalyst dose 0.05g/ml and initial feed ratio (1:10) lactic acid to alcohol.

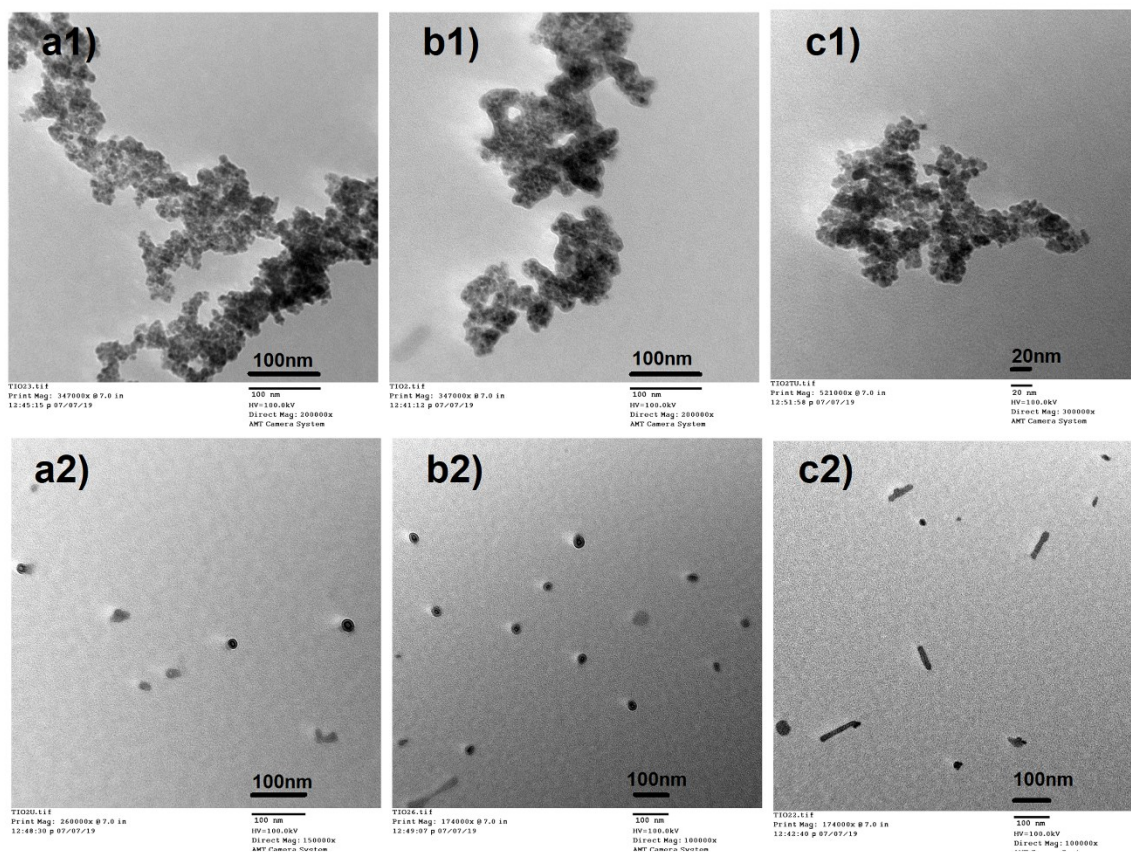

Figure-S1- TEM Micrographs (a1-a2) QD-TiO<sub>2</sub> (b1-b2) QD-TiO<sub>2</sub>@S and (c1-c2)Re-QD-TiO<sub>2</sub>@S

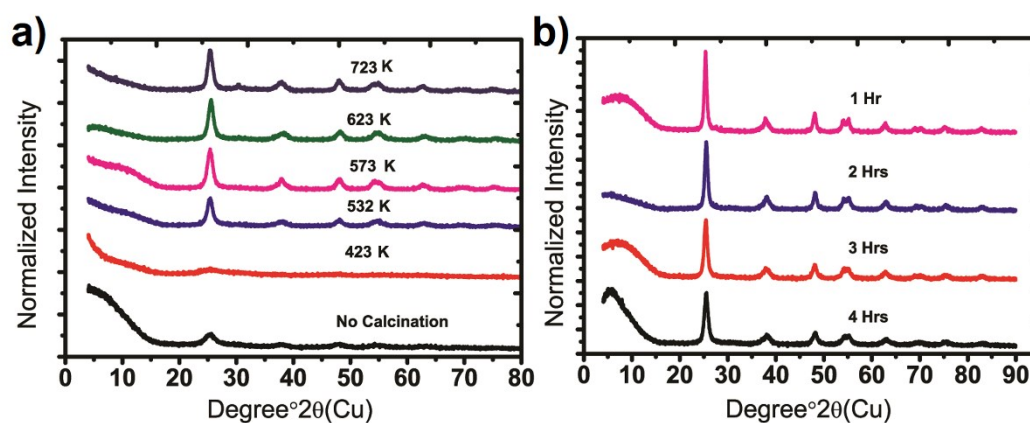

Figure-S2-. (a) XRD pattern QD-TiO<sub>2</sub>@S calcined for 1 hr at various calcinations temperatures . (b) XRD pattern QD-TiO<sub>2</sub>@S calcined at 573 K at various calcinations times from 1 hr to 4hrs.

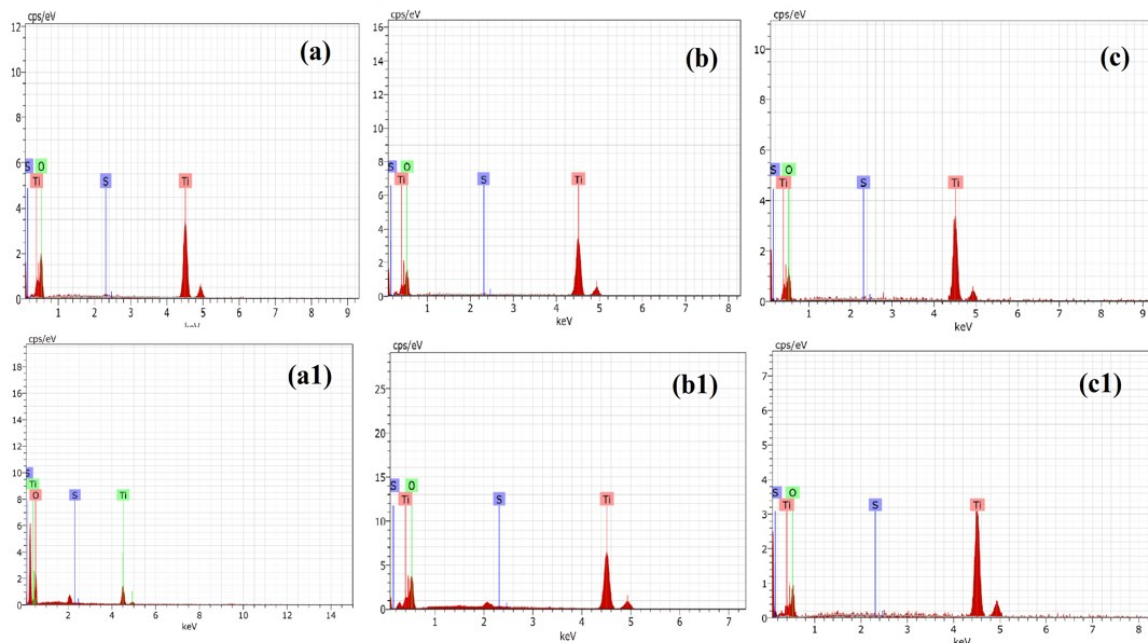

Figure-S3- EDS data of (a)QD-TiO<sub>2</sub>@S , (b)P25-TiO<sub>2</sub>@S and (c)COM-TiO<sub>2</sub>@S and (a1)Re-QD-TiO<sub>2</sub>@S , (b1)Re-P25-TiO<sub>2</sub>@S and (c1)Re-COM-TiO<sub>2</sub> .

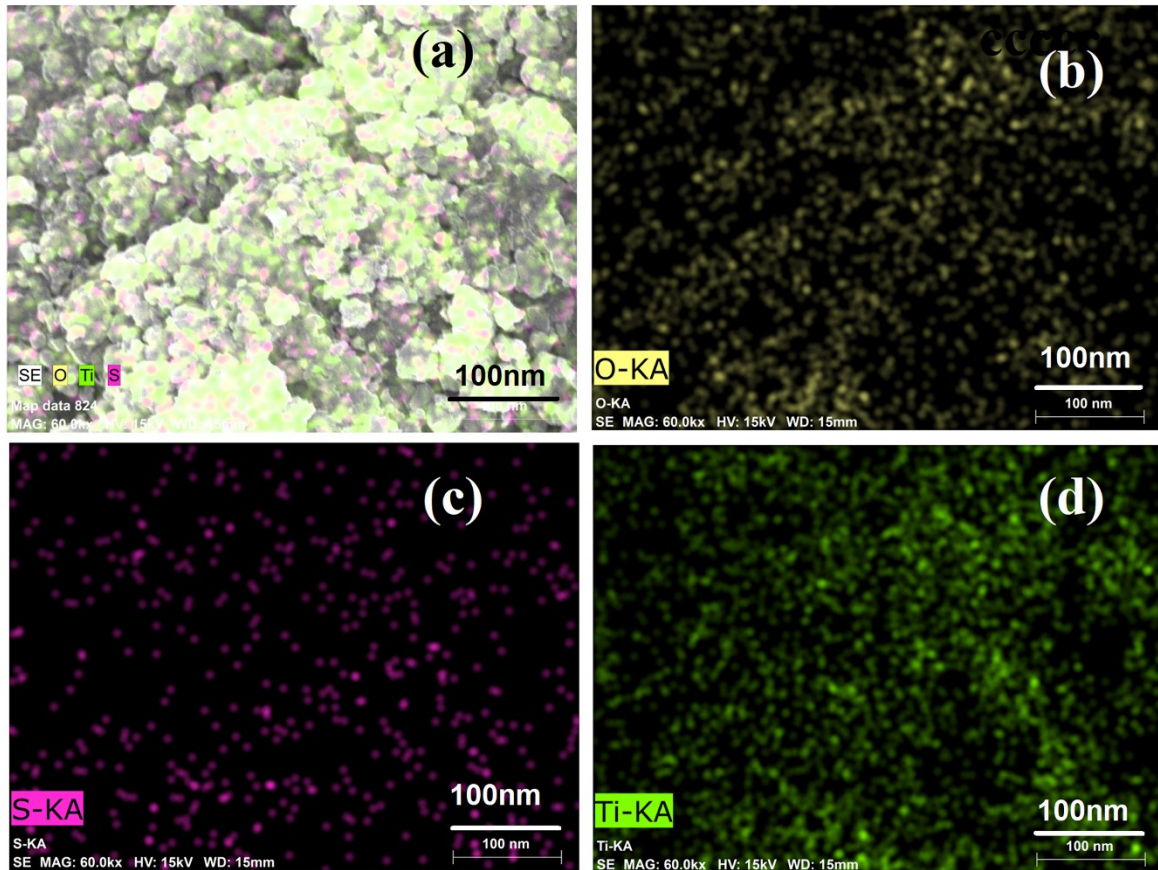

Figure S4- Elemental dispersion mapping of QD-TiO<sub>2</sub>@S (a) Combined elemental mapping (b) O mapping (c) S mapping (d) Ti mapping

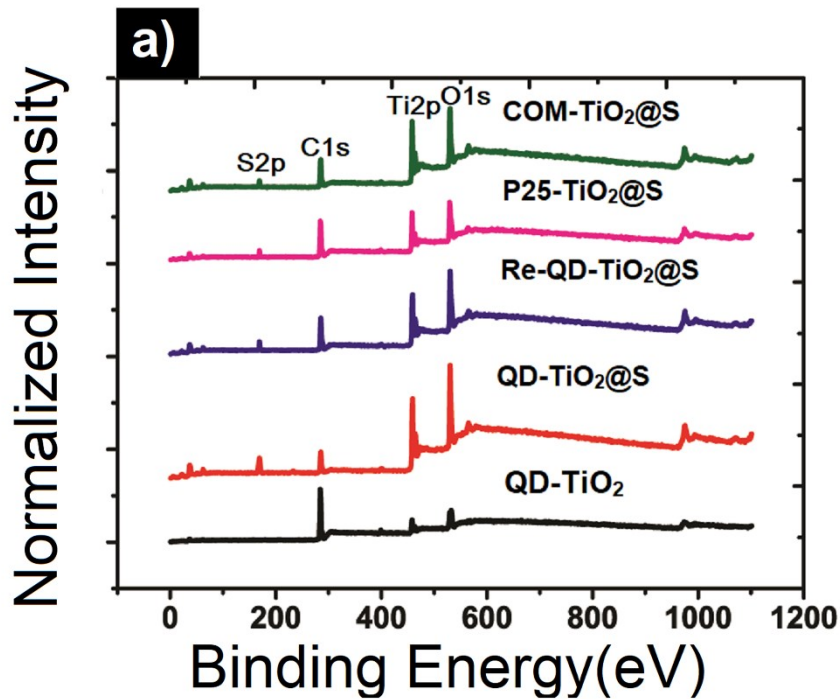

Figure S5- XPS survey scan of QD-TiO<sub>2</sub>, QD-TiO<sub>2</sub>@S and Re-QD-TiO<sub>2</sub> compared with P25-TiO<sub>2</sub>@S and COM-TiO<sub>2</sub>@S

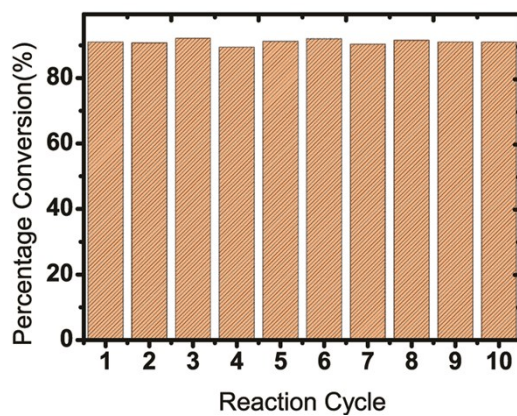

Figure -S6- . Reusability test of catalyst at 303.15K , catalyst dose 0.05g/ml and initial feed ratio (1:10) lactic acid to alcohol.
